# Supplementary material for: Background nitrogen dioxide (NO 2 ) over the United States and its implications for satellite observations and trends: effects of nitrate photolysis, aircraft, and open fires
Source: Copernicus journal article supplement (doi:10.5194/acp-23-6271-2023), 2023-06-07
Supplement: Supplementary file 1 [file acp-23-6271-2023-supplement.pdf]

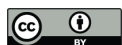

*Supplement of*

## **Background nitrogen dioxide (NO<sub>2</sub>) over the United States and its implications for satellite observations and trends: effects of nitrate photolysis, aircraft, and open fires**

**Ruijun Dang et al.**

*Correspondence to:* Ruijun Dang ([rjdang@seas.harvard.edu](mailto:rjdang@seas.harvard.edu))

The copyright of individual parts of the supplement might differ from the article licence.

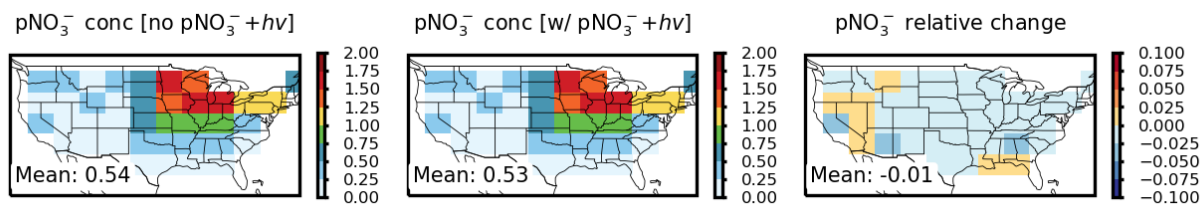

Figure S1. Simulated surface particulate nitrate ( $\text{pNO}_3^-$ ) concentrations in CONUS 2017. From left to right shows the result without nitrate photolysis (unit:  $\mu\text{g m}^{-3}$ ), with nitrate photolysis (unit:  $\mu\text{g m}^{-3}$ ), and the relative change (unit: 1) from nitrate photolysis. Mean values over CONUS are given inset.

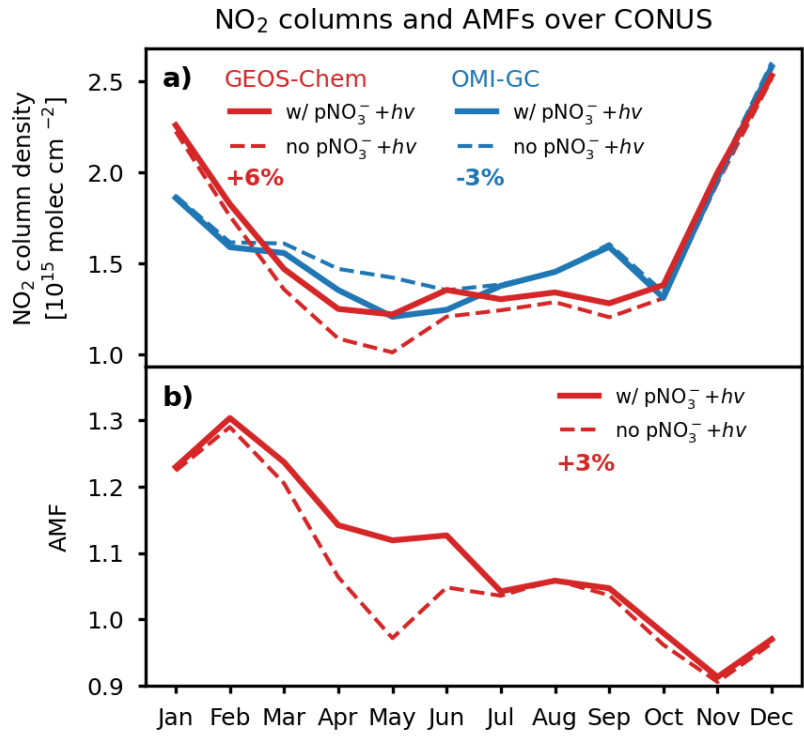

Figure S2. Same as Figure 4 except for year 2009.
